## CORRECTION

# Correction: Psychosocial and lifestyle impacts of spontaneous coronary artery dissection: A quantitative study

Barbara M. Murphy, Michelle C. Rogerson, Michael R. Le Grande, Stephanie Hesselson, Siiri E. Iismaa, Robert M. Graham, Alun C. Jackson

[Fig 1](#) is incorrect. Domains 1–6 are missing in the published figure. Please see the correct [Fig 1](#) here.

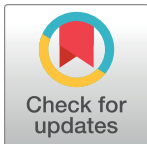

## OPEN ACCESS

**Citation:** Murphy BM, Rogerson MC, Le Grande MR, Hesselson S, Iismaa SE, Graham RM, et al. (2024) Correction: Psychosocial and lifestyle impacts of spontaneous coronary artery dissection: A quantitative study. PLoS ONE 19(5): e0304537. <https://doi.org/10.1371/journal.pone.0304537>

**Published:** May 30, 2024

**Copyright:** © 2024 Murphy et al. This is an open access article distributed under the terms of the [Creative Commons Attribution License](#), which permits unrestricted use, distribution, and reproduction in any medium, provided the original author and source are credited.

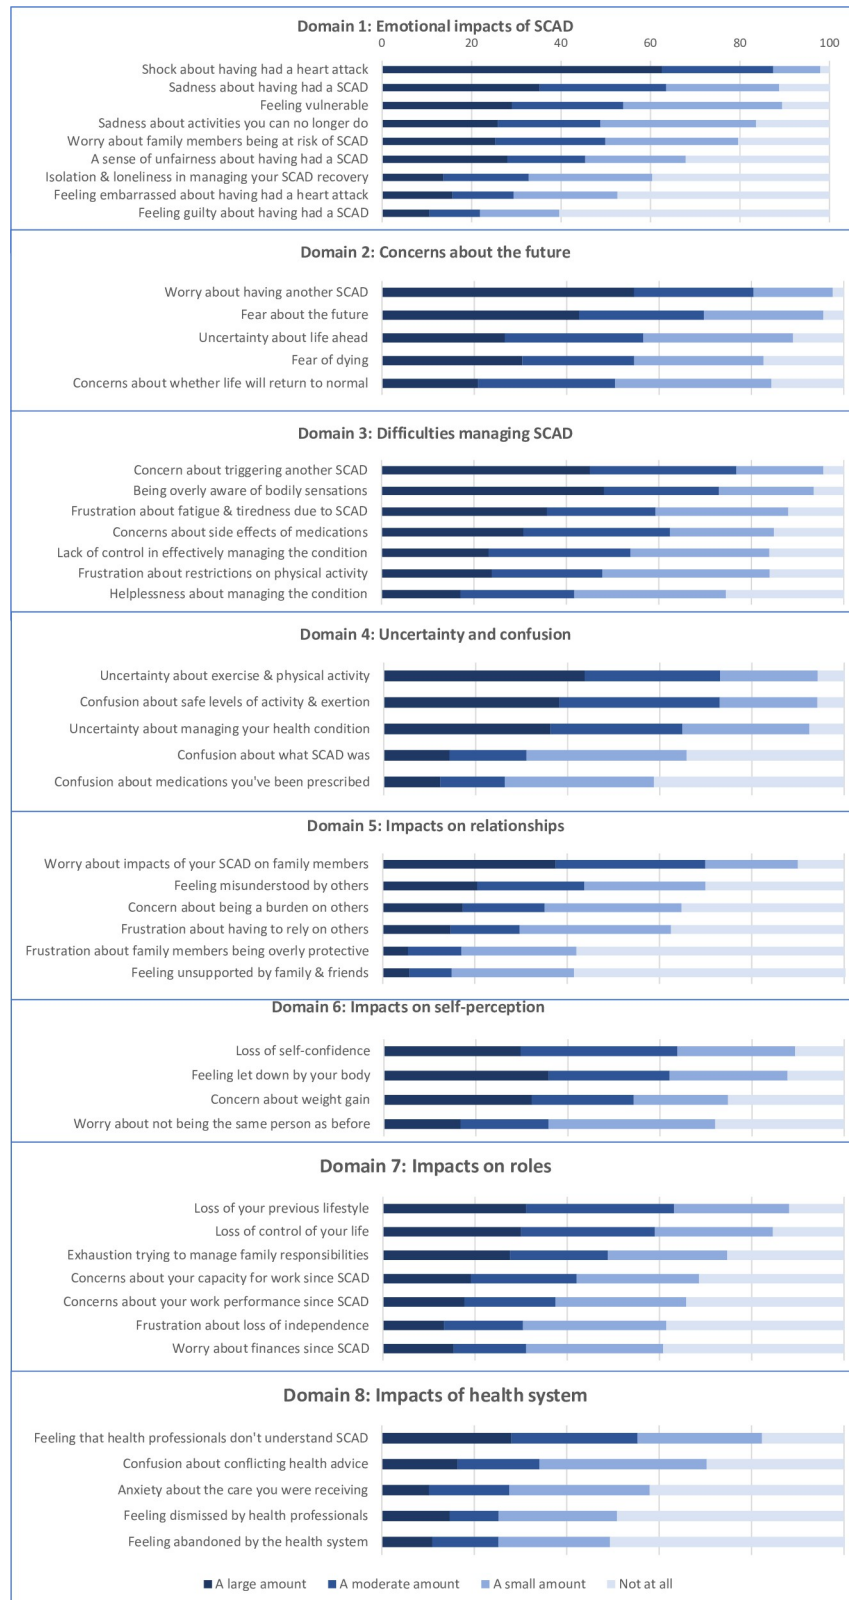

**Fig 1. Ratings for all SCAD psychosocial impact items across the eight domains.** *N* = 293. Note: SCAD = Spontaneous coronary artery dissection.

<https://doi.org/10.1371/journal.pone.0304537.g001>

## Reference

1. Murphy BM, Rogerson MC, Le Grande MR, Hesselton S, Iismaa SE, Graham RM, et al. (2024) Psychosocial and lifestyle impacts of spontaneous coronary artery dissection: A quantitative study. PLoS ONE 19(1): e0296224. <https://doi.org/10.1371/journal.pone.0296224> PMID: 38181032
